# Supplementary material for: High-performance quasi-solid-state flexible supercapacitors based on a flower-like NiCo metal–organic framework
Source: Royal Society of Chemistry journal article supplement (doi:10.1039/d1ra08785a), 2022-01-01
Supplement: d1ra08785a1.pdf [file d1ra08785a1.pdf]

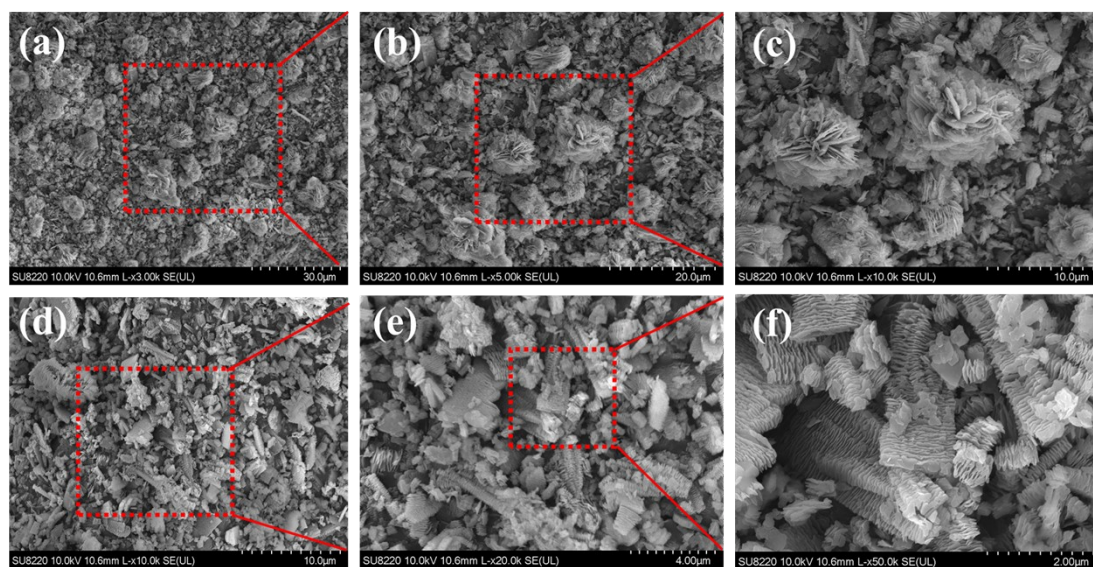

**Fig. S1** SEM images of (a-c) NiCo MOF-2, (e-f) NiCo MOF-4.

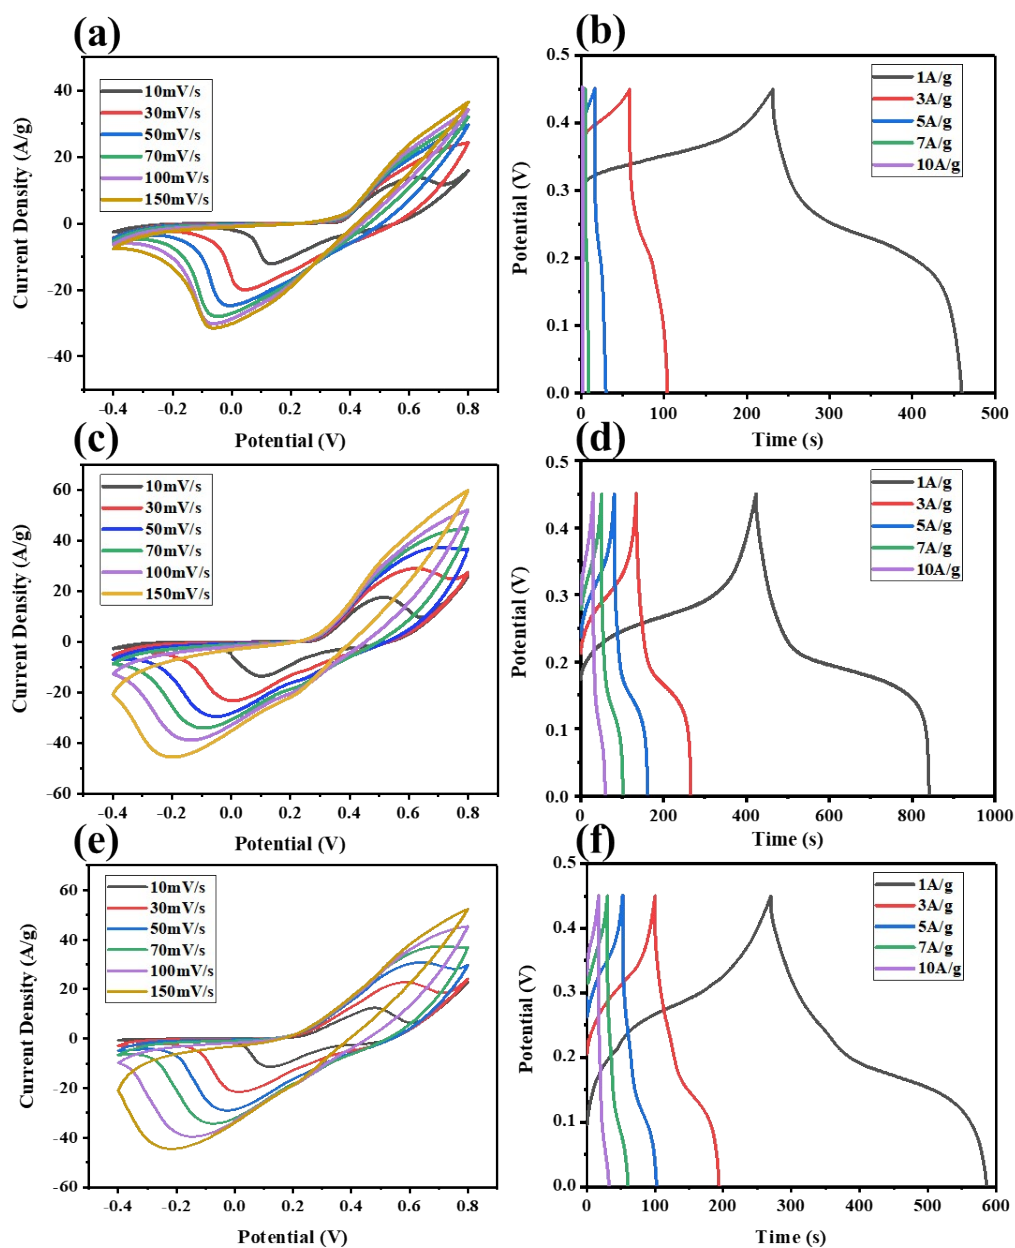

**Fig. S2** Electrochemical performances in 1 M KOH solution. CV curves at various scan rate from 10 to 150 mV/s, and GCD curves at different current densities from 1 to 10 A/g of NiCo MOF-0 (a-b), NiCo MOF-2 (c-d) and NiCo MOF-4 (e-f).
